# Supplementary material for: Disease and demography: a systems-dynamic cohort-component population model to assess the implications of disease-specific mortality targets
Source: HighWire-hosted journal article supplement (doi:10.1136/bmjopen-2020-043313), 2021-05-01
Supplement: bmjopen-2020-043313supp001_data_supplement.pdf [file bmjopen-2020-043313supp001_data_supplement.pdf]

**Supplementary Table S1: Mapping of disease categories**

| Broad groups                                                 | WHO GHE Code                             | GHE Cause name*                                                                                                                                                                                                                                                                                                                                                                                                                                                                                                                       |
|--------------------------------------------------------------|------------------------------------------|---------------------------------------------------------------------------------------------------------------------------------------------------------------------------------------------------------------------------------------------------------------------------------------------------------------------------------------------------------------------------------------------------------------------------------------------------------------------------------------------------------------------------------------|
| Communicable, maternal, perinatal and nutritional conditions | I.A. Infectious and parasitic diseases   | (1-12): Tuberculosis; STDs excluding HIV; HIV/AIDS; Diarrhoeal diseases; Childhood-cluster diseases; Meningitis; Encephalitis; Hepatitis; Parasitic and vector diseases; Intestinal nematode infections; Leprosy; Other infectious diseases                                                                                                                                                                                                                                                                                           |
|                                                              | I.B. Respiratory Infectious              | (1-3): Lower respiratory infections; Upper respiratory infections; Otitis media                                                                                                                                                                                                                                                                                                                                                                                                                                                       |
|                                                              | I.C. Maternal conditions                 |                                                                                                                                                                                                                                                                                                                                                                                                                                                                                                                                       |
|                                                              | I.D. Neonatal conditions                 | (1-4): Preterm birth complications; Birth asphyxia and birth trauma; Neonatal sepsis and infections; Other neonatal conditions                                                                                                                                                                                                                                                                                                                                                                                                        |
|                                                              | I.E. Nutritional deficiencies            | (1-5): Protein-energy malnutrition; Iodine deficiency; Vitamin A deficiency; Iron-deficiency anaemia; Other nutritional deficiencies                                                                                                                                                                                                                                                                                                                                                                                                  |
| Neoplasms                                                    | II.A. Malignant neoplasms                | (1-24): Mouth and oropharynx cancers; Oesophagus cancer; Stomach cancer; Colon and rectum cancers; Liver cancer; Pancreas cancer; Trachea, bronchus, lung cancers; Melanoma and other skin cancers; Breast cancer; Cervix uteri cancer; Corpus uteri; cancer; Ovary cancer; Prostate cancer; Testicular cancer; Kidney cancer; Bladder cancer; Brain and nervous system cancers; Gallbladder and biliary tract cancer; Larynx cancer; Thyroid cancer; Mesothelioma; Lymphomas, multiple myeloma; Leukaemia; Other malignant neoplasms |
|                                                              | II.B. Other neoplasms                    |                                                                                                                                                                                                                                                                                                                                                                                                                                                                                                                                       |
| Diabetes                                                     | II.C. Diabetes mellitus                  |                                                                                                                                                                                                                                                                                                                                                                                                                                                                                                                                       |
| Cardiovascular diseases                                      | II. H. Cardiovascular diseases           | (1-6): Rheumatic heart disease; Hypertensive heart disease; Ischaemic heart disease; Stroke; Cardiomyopathy, myocarditis, endocarditis; Other circulatory diseases                                                                                                                                                                                                                                                                                                                                                                    |
| Respiratory diseases                                         | II.I. Respiratory diseases               | (1-3): Chronic obstructive pulmonary disease; Asthma; Other respiratory diseases                                                                                                                                                                                                                                                                                                                                                                                                                                                      |
| Other NCDs and Injuries                                      | II.D. Endocrine, blood, immune disorders | (1-4): Thalassaemias; Sickle cell disorders and trait; Other haemoglobinopathies and haemolytic anaemias; Other endocrine, blood and immune disorders                                                                                                                                                                                                                                                                                                                                                                                 |
|                                                              | II.E. Mental and substance use disorders | (1-11): Depressive disorders; Bipolar disorder; Schizophrenia; Alcohol use disorders; Drug use disorders; Anxiety disorders; Eating disorders; Autism and Asperger syndrome; Childhood behavioural disorders; Idiopathic intellectual disability; Other mental and behavioural disorders                                                                                                                                                                                                                                              |
|                                                              | II.F. Neurological conditions            | (1-7): Alzheimer disease and other dementias; Parkinson disease; Epilepsy; Multiple sclerosis; Migraine; Non-migraine headache; Other neurological conditions                                                                                                                                                                                                                                                                                                                                                                         |
|                                                              | II. J. Digestive diseases                | (1-9): Peptic ulcer disease; Cirrhosis of the liver; Appendicitis; Gastritis and duodenitis; Paralytic ileus and intestinal obstruction; Inflammatory bowel disease; Gallbladder and biliary diseases; Pancreatitis; Other digestive diseases                                                                                                                                                                                                                                                                                         |
|                                                              | II.K. Genitourinary diseases             | (1-6): Kidney diseases; Benign prostatic hyperplasia; Urolithiasis; Other urinary diseases; Infertility; Gynecological diseases                                                                                                                                                                                                                                                                                                                                                                                                       |
|                                                              | II.L. Skin diseases                      |                                                                                                                                                                                                                                                                                                                                                                                                                                                                                                                                       |
|                                                              | II.M. Musculoskeletal diseases           | (1-5): Rheumatoid arthritis; Osteoarthritis; Gout; Back and neck pain; Other musculoskeletal disorders                                                                                                                                                                                                                                                                                                                                                                                                                                |
|                                                              | II.N. Congenital anomalies               | (1-6): Neural tube defects; Cleft lip and cleft palate; Down syndrome; Congenital heart anomalies; Other chromosomal anomalies; Other congenital anomalies                                                                                                                                                                                                                                                                                                                                                                            |
|                                                              | II.O: Oral conditions                    |                                                                                                                                                                                                                                                                                                                                                                                                                                                                                                                                       |
|                                                              | II.P. Sudden infant death syndrome       |                                                                                                                                                                                                                                                                                                                                                                                                                                                                                                                                       |
|                                                              | III.A. Unintentional injuries            | (1-8): Road injury; Poisonings; Falls; Fire, heat and hot substances; Drowning Exposure to mechanical forces; Natural disasters; Other unintentional injuries                                                                                                                                                                                                                                                                                                                                                                         |
|                                                              | III.B. Intentional injuries              | (1-3): Self-harm; Interpersonal violence; Collective violence and legal intervention                                                                                                                                                                                                                                                                                                                                                                                                                                                  |

**Note:** \* See Annex Table A in: World Health Organization. (2018). WHO methods and data sources for global burden of disease estimates 2000-2016. *Global Health Estimates Technical Paper WHO/HIS/IER/GHE/2018.4*, WHO, Geneva.
