# Supplementary material for: Disease and demography: a systems-dynamic cohort-component population model to assess the implications of disease-specific mortality targets
Source: HighWire-hosted journal article supplement (doi:10.1136/bmjopen-2020-043313), 2021-05-01
Supplement: bmjopen-2020-043313supp003_data_supplement.pdf [file bmjopen-2020-043313supp003_data_supplement.pdf]

Supplementary Table S3: Baseline data for 2015

| Age           | Fertility rate |         | Death rate: Total |        | Death rate: CMPN |        | Death rate: CVD |        | Death rate: DBT |       | Death rate: RSP |        | Death rate: NPL |       | Death rate: OTH |        | Net migration rate |       |
|---------------|----------------|---------|-------------------|--------|------------------|--------|-----------------|--------|-----------------|-------|-----------------|--------|-----------------|-------|-----------------|--------|--------------------|-------|
|               | Per 1000 women |         | Per 1000 people   |        |                  |        |                 |        |                 |       |                 |        |                 |       |                 |        |                    |       |
|               | Data           | Calib.* | M**               | F**    | M                | F      | M               | F      | M               | F     | M               | F      | M               | F     | M               | F      | M                  | F     |
| < 1 years     |                |         | 31.74             | 28.18  | 24.92            | 22.13  | 0.12            | 0.11   | 0.01            | 0.01  | 0.06            | 0.10   | 0.31            | 0.33  | 6.34            | 5.50   | 0.00               | 0.00  |
| 1 – 4 years   |                |         | 1.73              | 1.69   | 1.36             | 1.33   | 0.01            | 0.01   | 0.00            | 0.00  | 0.00            | 0.01   | 0.02            | 0.02  | 0.35            | 0.33   | 0.00               | 0.00  |
| 5 - 9 years   |                |         | 0.55              | 0.66   | 0.20             | 0.35   | 0.01            | 0.02   | 0.00            | 0.00  | 0.00            | 0.01   | 0.03            | 0.03  | 0.30            | 0.25   | 0.29               | 0.16  |
| 10 – 14 years |                |         | 0.53              | 0.52   | 0.20             | 0.27   | 0.01            | 0.01   | 0.00            | 0.00  | 0.00            | 0.01   | 0.03            | 0.02  | 0.29            | 0.20   | 0.83               | 0.20  |
| 15 - 19 years | 75             | 77      | 0.83              | 0.86   | 0.16             | 0.30   | 0.07            | 0.08   | 0.00            | 0.01  | 0.01            | 0.03   | 0.05            | 0.06  | 0.53            | 0.38   | -6.17              | -0.24 |
| 20 – 24 years | 137            | 140     | 0.94              | 0.88   | 0.18             | 0.31   | 0.08            | 0.08   | 0.00            | 0.01  | 0.02            | 0.03   | 0.06            | 0.06  | 0.61            | 0.39   | -16.49             | -0.54 |
| 25 – 29 years | 105            | 105     | 1.06              | 1.06   | 0.20             | 0.37   | 0.09            | 0.10   | 0.00            | 0.01  | 0.02            | 0.04   | 0.07            | 0.08  | 0.68            | 0.47   | -11.70             | -0.19 |
| 30 - 34 years | 56             | 56      | 1.33              | 1.30   | 0.31             | 0.25   | 0.34            | 0.28   | 0.02            | 0.03  | 0.05            | 0.06   | 0.21            | 0.41  | 0.41            | 0.26   | -7.46              | -0.19 |
| 35 - 39 years | 25             | 25      | 1.79              | 1.65   | 0.41             | 0.32   | 0.45            | 0.36   | 0.02            | 0.04  | 0.06            | 0.08   | 0.28            | 0.52  | 0.56            | 0.33   | -6.12              | 0.01  |
| 40 - 44 years | 9              | 9       | 2.81              | 2.09   | 0.65             | 0.41   | 0.71            | 0.45   | 0.03            | 0.05  | 0.10            | 0.10   | 0.44            | 0.66  | 0.88            | 0.41   | -3.63              | 0.16  |
| 45 - 49 years | 3              | 3       | 4.53              | 2.76   | 1.04             | 0.54   | 1.15            | 0.60   | 0.05            | 0.07  | 0.16            | 0.13   | 0.72            | 0.88  | 1.41            | 0.54   | -1.74              | 0.16  |
| 50 – 54 years |                |         | 8.33              | 5.01   | 1.58             | 0.51   | 2.84            | 1.55   | 0.12            | 0.16  | 0.56            | 0.37   | 1.61            | 1.71  | 1.60            | 0.72   | -0.34              | 0.14  |
| 55 – 59 years |                |         | 11.39             | 8.29   | 2.17             | 0.84   | 3.89            | 2.56   | 0.17            | 0.26  | 0.77            | 0.62   | 2.21            | 2.83  | 2.19            | 1.19   | -0.13              | 0.12  |
| 60 – 64 years |                |         | 22.99             | 16.37  | 4.13             | 1.54   | 8.92            | 7.55   | 0.55            | 0.77  | 2.79            | 2.12   | 3.28            | 2.26  | 3.32            | 2.13   | -0.04              | 0.07  |
| 65 – 69 years |                |         | 27.91             | 24.38  | 5.01             | 2.30   | 10.83           | 11.25  | 0.67            | 1.14  | 3.38            | 3.15   | 3.98            | 3.37  | 4.03            | 3.17   | 0.21               | 0.06  |
| 70 – 74 years |                |         | 56.59             | 45.38  | 12.57            | 7.03   | 18.84           | 20.16  | 2.22            | 3.09  | 8.94            | 5.87   | 5.80            | 2.27  | 8.22            | 6.96   | 0.21               | 0.06  |
| 75 – 79 years |                |         | 60.00             | 46.35  | 13.33            | 7.18   | 19.97           | 20.59  | 2.36            | 3.16  | 9.48            | 6.00   | 6.14            | 2.31  | 8.72            | 7.11   | 0.21               | 0.06  |
| 80 – 84 years |                |         | 90.37             | 71.99  | 20.07            | 11.16  | 30.08           | 31.98  | 3.55            | 4.90  | 14.28           | 9.32   | 9.25            | 3.59  | 13.13           | 11.04  | 0.21               | 0.06  |
| 85 year       |                |         | 151.53            | 125.05 | 33.66            | 19.38  | 50.44           | 55.55  | 5.95            | 8.52  | 23.94           | 16.18  | 15.52           | 6.24  | 22.02           | 19.17  | 0.21               | 0.06  |
| 90 year       |                |         | 434.35            | 416.70 | 96.49            | 64.59  | 144.59          | 185.11 | 17.05           | 28.38 | 68.63           | 53.92  | 44.48           | 20.81 | 63.12           | 63.89  | 0.21               | 0.06  |
| 95 year       |                |         | 717.18            | 708.35 | 159.31           | 109.79 | 238.73          | 314.67 | 28.16           | 48.25 | 113.32          | 91.67  | 73.45           | 35.37 | 104.22          | 108.60 | 0.21               | 0.06  |
| 100 and above |                |         | 1000              | 1000   | 222.1            | 155.00 | 332.88          | 444.24 | 39.26           | 68.12 | 158.00          | 129.41 | 102.41          | 49.93 | 145.31          | 153.32 | 0.21               | 0.06  |

Note: \* 2015 age-group specific fertility data obtained from the Bangladesh Bureau of Statistics produced total fertility rate of 2.05; the data has been calibrated up to produce a total fertility rate of 2.10 for 2015. \*\* M: Male; F: Female. The numbers are rounded to two decimal points.
