# Supplementary material for: Disease and demography: a systems-dynamic cohort-component population model to assess the implications of disease-specific mortality targets
Source: HighWire-hosted journal article supplement (doi:10.1136/bmjopen-2020-043313), 2021-05-01
Supplement: bmjopen-2020-043313supp005_data_supplement.pdf [file bmjopen-2020-043313supp005_data_supplement.pdf]

Supplementary Table S5: Years of lives lost (YLL) and YLL averted

|                                           | YLL and YLL averted in 2025 |         |         | YLL and YLL averted in 2030 |         |         | Cumulative number of YLL and YLL averted: 2015 - 2030 |          |            |
|-------------------------------------------|-----------------------------|---------|---------|-----------------------------|---------|---------|-------------------------------------------------------|----------|------------|
|                                           | Male                        | Female  | Total   | Male                        | Female  | Total   | Male                                                  | Female   | Total      |
| <b>Cardiovascular Diseases</b>            |                             |         |         |                             |         |         |                                                       |          |            |
| <b>Years of lives lost (YLL)</b>          |                             |         |         |                             |         |         |                                                       |          |            |
| <i>Status quo</i>                         | 2628410                     | 2395870 | 5024280 | 2996780                     | 2853440 | 5850220 | 39431070                                              | 35694730 | 75,125,800 |
| <i>Trend</i>                              | 2538880                     | 2280630 | 4819510 | 2866200                     | 2661530 | 5527730 | 38364420                                              | 34307980 | 72,672,400 |
| <i>NCD target</i>                         | 2289050                     | 2094930 | 4383980 | 2428830                     | 2320920 | 4749750 | 35338430                                              | 32042630 | 67,381,060 |
| <b>YLL averted in NCD target scenario</b> |                             |         |         |                             |         |         |                                                       |          |            |
| <i>Compared to status quo</i>             | 339360                      | 300940  | 640300  | 567950                      | 532520  | 1100470 | 4092640                                               | 3652100  | 7,744,740  |
| <i>Compared to trend</i>                  | 249830                      | 185700  | 435530  | 437370                      | 340610  | 777980  | 3025990                                               | 2265350  | 5,291,340  |
| <b>Respiratory Diseases</b>               |                             |         |         |                             |         |         |                                                       |          |            |
| <b>Years of lives lost (YLL)</b>          |                             |         |         |                             |         |         |                                                       |          |            |
| <i>Status quo</i>                         | 749096                      | 664638  | 1413734 | 873661                      | 789733  | 1663394 | 11252806                                              | 9933068  | 21,185,874 |
| <i>Trend</i>                              | 683002                      | 625524  | 1308526 | 762576                      | 723793  | 1486369 | 10449656                                              | 9458391  | 19,908,047 |
| <i>NCD target</i>                         | 657731                      | 575196  | 1232927 | 718066                      | 630902  | 1348968 | 10143973                                              | 8843957  | 18,987,930 |
| <b>YLL averted in NCD target scenario</b> |                             |         |         |                             |         |         |                                                       |          |            |
| <i>Compared to status quo</i>             | 91365                       | 89442   | 180807  | 155595                      | 158831  | 314426  | 1108833                                               | 1089111  | 2,197,944  |
| <i>Compared to trend</i>                  | 25271                       | 50328   | 75599   | 44510                       | 92891   | 137401  | 305683                                                | 614434   | 920,117    |
| <b>Diabetes</b>                           |                             |         |         |                             |         |         |                                                       |          |            |
| <b>Years of lives lost (YLL)</b>          |                             |         |         |                             |         |         |                                                       |          |            |
| <i>Status quo</i>                         | 175112                      | 286897  | 462009  | 203287                      | 341275  | 544562  | 2642602                                               | 4303544  | 6,946,146  |
| <i>Trend</i>                              | 175277                      | 298383  | 473660  | 205832                      | 364177  | 570009  | 2647001                                               | 4447344  | 7,094,345  |
| <i>NCD target</i>                         | 159998                      | 260900  | 420898  | 179167                      | 296554  | 475721  | 2462325                                               | 3991308  | 6,453,633  |
| <b>YLL averted in NCD target scenario</b> |                             |         |         |                             |         |         |                                                       |          |            |
| <i>Compared to status quo</i>             | 15114                       | 25997   | 41111   | 24120                       | 44721   | 68841   | 180277                                                | 312236   | 492,513    |
| <i>Compared to trend</i>                  | 15279                       | 37483   | 52762   | 26665                       | 67623   | 94288   | 184676                                                | 456036   | 640,712    |
| <b>Neoplasm</b>                           |                             |         |         |                             |         |         |                                                       |          |            |
| <b>Years of lives lost (YLL)</b>          |                             |         |         |                             |         |         |                                                       |          |            |
| <i>Status quo</i>                         | 1280430                     | 1492110 | 2772540 | 1422430                     | 1682870 | 3105300 | 19346850                                              | 22311220 | 41,658,070 |
| <i>Trend</i>                              | 1308030                     | 1529450 | 2837480 | 1479230                     | 1750120 | 3229350 | 19693330                                              | 22768490 | 42,461,820 |
| <i>NCD target</i>                         | 1136680                     | 1263360 | 2400040 | 1185180                     | 1288140 | 2473320 | 17621820                                              | 19542930 | 37,164,750 |
| <b>YLL averted in NCD target scenario</b> |                             |         |         |                             |         |         |                                                       |          |            |
| <i>Compared to status quo</i>             | 143750                      | 228750  | 372500  | 237250                      | 394730  | 631980  | 1725030                                               | 2768290  | 4,493,320  |
| <i>Compared to trend</i>                  | 171350                      | 266090  | 437440  | 294050                      | 461980  | 756030  | 2071510                                               | 3225560  | 5,297,070  |

Note: Calculations derived from the model.
